# Supplementary material
Source: HighWire-hosted journal article supplement (https://bmjopen.bmj.com/content/12/6/e062144)
Supplement: inline-supplementary-material-1 [file inline-supplementary-material-1.pdf]

Supplementary Material  
Search Strategy

| Database        | PubMed                                                                                                                                                                                                                                                                                                                                                                                                                                                                                                                                                                                                                                                                                                                                                                                                                                                                                                                                                                                                                                                                                                                                                                                                                                                                                                                                                                                                                                                                                                                                                                                                                                                                      | DZI SoLit                                                                                                                                                                                                                                                                                                                                                                                                                                                                                                                                                                                                                                                                                                                                                                                                                                                                                                                                                                                                                                                                                                                                                                                                                                                                                                                                                                                                                                                                                                                                                                                                                                                                                                                                                                                                | Web of Science                                                                                                                                                                                                                                                                                                                                                                                                                                                                                                                                                                                                |
|-----------------|-----------------------------------------------------------------------------------------------------------------------------------------------------------------------------------------------------------------------------------------------------------------------------------------------------------------------------------------------------------------------------------------------------------------------------------------------------------------------------------------------------------------------------------------------------------------------------------------------------------------------------------------------------------------------------------------------------------------------------------------------------------------------------------------------------------------------------------------------------------------------------------------------------------------------------------------------------------------------------------------------------------------------------------------------------------------------------------------------------------------------------------------------------------------------------------------------------------------------------------------------------------------------------------------------------------------------------------------------------------------------------------------------------------------------------------------------------------------------------------------------------------------------------------------------------------------------------------------------------------------------------------------------------------------------------|----------------------------------------------------------------------------------------------------------------------------------------------------------------------------------------------------------------------------------------------------------------------------------------------------------------------------------------------------------------------------------------------------------------------------------------------------------------------------------------------------------------------------------------------------------------------------------------------------------------------------------------------------------------------------------------------------------------------------------------------------------------------------------------------------------------------------------------------------------------------------------------------------------------------------------------------------------------------------------------------------------------------------------------------------------------------------------------------------------------------------------------------------------------------------------------------------------------------------------------------------------------------------------------------------------------------------------------------------------------------------------------------------------------------------------------------------------------------------------------------------------------------------------------------------------------------------------------------------------------------------------------------------------------------------------------------------------------------------------------------------------------------------------------------------------|---------------------------------------------------------------------------------------------------------------------------------------------------------------------------------------------------------------------------------------------------------------------------------------------------------------------------------------------------------------------------------------------------------------------------------------------------------------------------------------------------------------------------------------------------------------------------------------------------------------|
| Web             | <a href="https://pubmed.ncbi.nlm.nih.gov/advanced/">https://pubmed.ncbi.nlm.nih.gov/advanced/</a>                                                                                                                                                                                                                                                                                                                                                                                                                                                                                                                                                                                                                                                                                                                                                                                                                                                                                                                                                                                                                                                                                                                                                                                                                                                                                                                                                                                                                                                                                                                                                                           | <a href="https://www.dzi.de/soziale-literatur/bibliothek/rechercheauftrag/">https://www.dzi.de/soziale-literatur/bibliothek/rechercheauftrag/</a>                                                                                                                                                                                                                                                                                                                                                                                                                                                                                                                                                                                                                                                                                                                                                                                                                                                                                                                                                                                                                                                                                                                                                                                                                                                                                                                                                                                                                                                                                                                                                                                                                                                        | <a href="https://www.webofscience.com/wos/woscc/advanced-search">https://www.webofscience.com/wos/woscc/advanced-search</a>                                                                                                                                                                                                                                                                                                                                                                                                                                                                                   |
| Dates of search | 2021-21-01 and 2021-10-08                                                                                                                                                                                                                                                                                                                                                                                                                                                                                                                                                                                                                                                                                                                                                                                                                                                                                                                                                                                                                                                                                                                                                                                                                                                                                                                                                                                                                                                                                                                                                                                                                                                   |                                                                                                                                                                                                                                                                                                                                                                                                                                                                                                                                                                                                                                                                                                                                                                                                                                                                                                                                                                                                                                                                                                                                                                                                                                                                                                                                                                                                                                                                                                                                                                                                                                                                                                                                                                                                          |                                                                                                                                                                                                                                                                                                                                                                                                                                                                                                                                                                                                               |
| Searchers       | Authors                                                                                                                                                                                                                                                                                                                                                                                                                                                                                                                                                                                                                                                                                                                                                                                                                                                                                                                                                                                                                                                                                                                                                                                                                                                                                                                                                                                                                                                                                                                                                                                                                                                                     | Librarian                                                                                                                                                                                                                                                                                                                                                                                                                                                                                                                                                                                                                                                                                                                                                                                                                                                                                                                                                                                                                                                                                                                                                                                                                                                                                                                                                                                                                                                                                                                                                                                                                                                                                                                                                                                                | Authors                                                                                                                                                                                                                                                                                                                                                                                                                                                                                                                                                                                                       |
| Selected Field  | Title/Abstract                                                                                                                                                                                                                                                                                                                                                                                                                                                                                                                                                                                                                                                                                                                                                                                                                                                                                                                                                                                                                                                                                                                                                                                                                                                                                                                                                                                                                                                                                                                                                                                                                                                              | All Fields                                                                                                                                                                                                                                                                                                                                                                                                                                                                                                                                                                                                                                                                                                                                                                                                                                                                                                                                                                                                                                                                                                                                                                                                                                                                                                                                                                                                                                                                                                                                                                                                                                                                                                                                                                                               | Topic / Category "Social Work"                                                                                                                                                                                                                                                                                                                                                                                                                                                                                                                                                                                |
| Query           | ((„Kooperation" OR „Zusammenarbeit" OR „Teamwork" OR „Interdisziplinär" OR „Interdisziplinarität" OR „Multidisziplinär" OR „Multidisziplinarität" OR „Interprofessionelle Zusammenarbeit" OR „Interprofessionalität" OR „Interprofessionell" OR „Gemeinwesenorientiert" OR „Sozialraumbezogen" OR „Cooperation" OR „collaboration" OR „teamwork" OR „interdisciplinary" OR „interdisciplinarity" OR „multidisciplinary" OR „multidisciplinarity" OR „interprofessional collaboration" OR „interprofessionality" OR „interprofessional" OR „Community-oriented" OR „Social space related") AND („Hausärzt*innen" OR „Hausärztinnen" OR „Hausärzte" OR „Hausarzt" OR „Hausarztmedizin" OR „Allgemeinmedizin" OR „Allgemeinmediziner" OR „Allgemeinmedizinerinnen" OR „Allgemeinmediziner*innen" OR „Allgemeinärzt*innen" OR „Allgemeinarzt" OR „Allgemeinärztin" OR „Allgemeinärzte" OR „Primärversorgung" OR „multidisziplinäre Primärversorgungsteam" OR „general practitioner" OR „general practice" OR „family physician" OR „primary care" OR „multidisciplinary primary care team") AND („Fachkräfte Soziale Arbeit" OR „Sozialarbeiterinnen" OR „Sozialarbeiter" OR „Sozialarbeiter*innen" OR „Sozialpädagoginnen" OR „Sozialpädagoge" OR „Sozialpädagog*innen" OR „Sozialarbeiter-Sprechstunde" OR „Psychosoziale Probleme" OR „psychosoziale Belastung" OR „soziale Versorgung" OR „psychosoziale Versorgung" OR „integrierte Versorgung" OR „Social worker" OR „social education worker" OR „social pedagogue" OR „social worker office hour" OR „psycho-social problems" OR „psycho-social burden" OR „social care" OR „psycho-social care" OR „integrated care")) | ((„Kooperation" ODER „Zusammenarbeit" ODER „Teamwork" ODER „Interdisziplinär" ODER „Interdisziplinarität" ODER „Multidisziplinär" ODER „Multidisziplinarität" ODER „Interprofessionelle Zusammenarbeit" ODER „Interprofessionalität" ODER „Interprofessionell" ODER „Gemeinwesenorientiert" ODER „Sozialraumbezogen" ODER „Cooperation" ODER „collaboration" ODER „teamwork" ODER „interdisciplinary" ODER „interdisciplinarity" ODER „multidisciplinary" ODER „multidisciplinarity" ODER „interprofessional collaboration" ODER „interprofessionality" ODER „interprofessional" ODER „Community-oriented" ODER „Social space related") UND („Hausärzt*innen" ODER „Hausärztinnen" ODER „Hausärzte" ODER „Hausarzt" ODER „Hausarztmedizin" ODER „Allgemeinmedizin" ODER „Allgemeinmediziner" ODER „Allgemeinmedizinerinnen" ODER „Allgemeinmediziner*innen" ODER „Allgemeinärzt*innen" ODER „Allgemeinarzt" ODER „Allgemeinärztin" ODER „Allgemeinärzte" ODER „Primärversorgung" ODER „multidisziplinäre Primärversorgungsteam" ODER „general practitioner" ODER „general practice" ODER „family physician" ODER „primary care" ODER „multidisciplinary primary care team") UND („Fachkräfte Soziale Arbeit" ODER „Sozialarbeiterinnen" ODER „Sozialarbeiter" ODER „Sozialarbeiter*innen" ODER „Sozialpädagoginnen" ODER „Sozialpädagoge" ODER „Sozialpädagog*innen" ODER „Sozialarbeiter-Sprechstunde" ODER „Psychosoziale Probleme" ODER „psychosoziale Belastung" ODER „soziale Versorgung" ODER „psychosoziale Versorgung" ODER „integrierte Versorgung" ODER „Social worker" ODER „social education worker" ODER „social pedagogue" ODER „social worker office hour" ODER „psycho-social problems" ODER „psycho-social burden" ODER „social care" ODER „psychosocial care" ODER „integrated care")) | TS=(Cooperation OR collaboration OR teamwork OR interdisciplinary OR interdisciplinarity OR multidisciplinary OR multidisciplinarity OR interprofessional collaboration OR interprofessionality OR interprofessional OR Community-oriented OR Social space related) AND TS=(general practitioner OR general practice OR family physician OR primary care OR multidisciplinary primary care team) AND TS=(Social worker OR social education worker OR social pedagogue OR social worker office hour OR psycho-social problems OR psycho-social burden OR social care OR psycho-social care OR integrated care) |
