# Supplementary material
Source: HighWire-hosted journal article supplement (https://bmjopen.bmj.com/content/12/6/e062144)
Supplement: inline-supplementary-material-2 [file inline-supplementary-material-2.pdf]

Supplementary Table 1  
Study characteristics and content of all included articles, N=72

|    | Author (year of publication)                  | Country of origin | Study design                        | Setting                    | Professionals |    |       | Target group                                                      | Key term (processes)                        | Key term (context)                                                       | Reference |
|----|-----------------------------------------------|-------------------|-------------------------------------|----------------------------|---------------|----|-------|-------------------------------------------------------------------|---------------------------------------------|--------------------------------------------------------------------------|-----------|
|    |                                               |                   |                                     |                            | GP            | SW | Nurse |                                                                   |                                             |                                                                          |           |
| 1  | Ashcroft, R.; Kourgiantakis, T. et al. (2018) | Canada            | Scoping review                      | Primary Mental Health Care | x             | x  | (x)   | Mentally ill patients                                             | Social workers practice                     | Interprofessional primary care health teams                              | [1]       |
| 2  | Ashcroft, R., McMillan, C. et al. (2018)      | Canada            | Cross-sectional study               | Primary Health Care        | x             | x  | x     | Mentally ill patients                                             | Case management                             | Ontario Family Health Teams (FHT)                                        | [2]       |
| 3  | Batchelor, P. & Kingsland, J. (2020)          | UK                | Narrative review / expert opinion   | Primary Care               | x             | x  | x     | Homeless people                                                   | Networking                                  | Primary Care Network (PCN), National Health Service (NHS)                | [3]       |
| 4  | Bauer, D. et al. (2005)                       | USA               | Project description                 | Primary Care               | x             | x  | x     | Patients with mental illness and/or low-income                    | Behavioral health therapeutic interventions | Primary Care Center (Pennsylvania)                                       | [4]       |
| 5  | Berner, B. & Floh, S. (2017)                  | Austria           | Narrative review / expert opinion   | Primary Care               | x             | x  |       | Homeless people                                                   | Low-threshold integrated care               | [Gesundheitliche Chancengleichheit]                                      | [5]       |
| 6  | Berrett-Abebe, J. et al. (2020)               | USA               | Cross-sectional study               | Community Health           | x             | x  | x     | Frail elderly patients                                            | Role of social workers in integrated care   | Community health worker and social worker                                | [6]       |
| 7  | Beushausen, J. & Caby, A. (2012)              | Germany           | Narrative review / expert opinion   | Social Work                | x             | x  |       | Vulnerable groups, especially patients with an addiction disorder | Role of social workers in primary care      | -                                                                        | [7]       |
| 8  | Bower, P. et al. (2018)                       | UK                | Mixed-methods study                 | Primary Care               | x             | x  | x     | Elderly patients                                                  | Implementation of joint up care             | Salford Integrated Care Program (SICP)                                   | [8]       |
| 9  | Bowers, L. et al. (2003)                      | UK                | Qualitative study with focus groups | Community Care             | x             | x  | x     | Mentally ill patients                                             | Compulsory admission                        | Multidisciplinary community mental health teams                          | [9]       |
| 10 | Buhr, G. et al. (2019)                        | USA               | Feasibility study                   | Primary Care               | x             | x  | x     | Elderly patients with cognitive impairment                        | Geriatric assessment                        | Geriatric Resource Teams (GRT)                                           | [10]      |
| 11 | Burroughs, H. et al. (2019)                   | UK                | Feasibility study                   | Community Care             | x             |    |       | Elderly patients with anxiety and depression                      | Community-based psychosocial intervention   | Non-traditional support workers                                          | [11]      |
| 12 | Chan, B. et al. (2018)                        | USA               | Study protocol                      | Primary Health Care        |               | x  | x     | Complex patients                                                  | Ambulatory intensive care unit intervention | Streamlined unified meaningfully managed interdisciplinary team (SUMMIT) | [12]      |
| 13 | Coleman, A. & Rummery, K. (2003)              | UK                | Mixed-methods study                 | Primary Care               | x             | x  | x     | Primary care patients                                             | Social services representation              | Primary Care Groups/ Trusts (PCG/PCT)                                    | [13]      |

Supplementary Table 1

Study characteristics and content of all included articles, N=72

|    |                                              |             |                                          |                     |   |   |   |                                                      |                                                  |                                                                                                      |      |
|----|----------------------------------------------|-------------|------------------------------------------|---------------------|---|---|---|------------------------------------------------------|--------------------------------------------------|------------------------------------------------------------------------------------------------------|------|
| 14 | Dambha-Miller, H. et al. (2021)              | UK          | Qualitative interview study              | Primary Care        | x | x | x | Elderly patients with multimorbidity                 | Integrated care: barriers and facilitators       | e.g. social prescribing                                                                              | [14] |
| 15 | Davey, B. et al. (2005)                      | UK          | Feasibility study                        | Primary Care        | x | x | x | Elderly patients with complex needs                  | Integrated care                                  | Primary Care Groups/ Trusts PCG/PCT; National Health Service (NHS), Community Health Services Trust  | [15] |
| 16 | Davidsen, A. S. et al. (2020)                | Denmark     | Feasibility study                        | Mental Health Care  | x | x |   | Patients with severe mental illness                  | Trans-sectoral treatment                         | Social psychiatry                                                                                    | [16] |
| 17 | Do Céu Barbieri-Figueiredo, M. et al. (2017) | Portugal    | Description of a care model              | Primary Health Care | x |   | x | Primary care patients                                | Role of nurses in primary care                   | Family Health Nurse Specialist                                                                       | [17] |
| 18 | Dongen van, J. J. J. et al. (2018)           | Netherlands | Prospective project evaluation           | Primary Care        | x | x | x | Primary care patients                                | Multifaceted program to enhance team functioning | Interprofessional team (IPT)                                                                         | [18] |
| 19 | Draper, B. et al. (2018)                     | Australia   | Narrative review / expert opinion        | Primary Care        | x | x | x | Patients with dementia and other cognitive disorders | Integrated care                                  | -                                                                                                    | [19] |
| 20 | Drennan, V. et al. (2005)                    | UK          | Feasibility study                        | Primary Care        | x |   | x | 'At risk' elderly patients                           | Health promotion                                 | Specialist health and social care team                                                               | [20] |
| 21 | Ferrante, J. M. et al (2010)                 | USA         | Qualitative cross-case comparative study | Primary Care        | x | x |   | Elderly patients                                     | Case management                                  | Patient Navigator (PN)                                                                               | [21] |
| 22 | Finker, S. (2017)                            | Austria     | Narrative review / expert opinion        | Social Work         | x | x |   | Primary care patients                                | Role of social workers in integrated care        | [Primärversorgungs-gesetz]                                                                           | [22] |
| 23 | Fraser, M. W. et al. (2018)                  | USA         | Systematic review                        | Primary Care        | x | x | x | Primary care patients                                | Role of social workers in integrated care        | Interprofessional team (IPT)                                                                         | [23] |
| 24 | Gadient, M. (2015)                           | Switzerland | Description of a care model              | Primary Care        | x | x |   | Patients with an addiction disorder                  | Addiction counseling                             | [Forum Suchtmedizin Ostschweiz (FOSUMOS)], [Ambulanter Strukturierter Alkoholentzug Sargans (ASAES)] | [24] |

Supplementary Table 1  
Study characteristics and content of all included articles, N=72

|    |                                 |             |                                         |                             |   |     |     |                                                           |                                                                             |                                                       |      |
|----|---------------------------------|-------------|-----------------------------------------|-----------------------------|---|-----|-----|-----------------------------------------------------------|-----------------------------------------------------------------------------|-------------------------------------------------------|------|
| 25 | García-Quinto, M. et al. (2021) | Spain       | Qualitative interview study             | Primary Health Care         | x | x   |     | Intimate partner violence cases                           | Case management                                                             | Primary health care centers (PHCC)                    | [25] |
| 26 | Grol, S. M. et al. (2018)       | Netherlands | Qualitative study with focus groups     | Primary Care                | x | x   | x   | Elderly patients                                          | Role of the general practitioner                                            | Multidisciplinary teams                               | [26] |
| 27 | Hanratty, B. et al. (2014)      | UK          | Mixed-methods study                     | Primary Care                | x | x   | x   | Elderly patients                                          | Transitions at the end of life                                              | -                                                     | [27] |
| 28 | Happell, B. et al. (2013)       | Australia   | Cross-sectional study                   | Mental Health Care          | x | (x) | x   | Patients with serious mental illness                      | Collaboration of Mental Health Nurses and Physical healthcare professionals | Mental Health Nurse Incentive Program (MHNIP)         | [28] |
| 29 | Harris, M. et al. (2013)        | UK          | Qualitative study with case discussions | Health Care Services        | x | x   | x   | Complex patients                                          | Interdisciplinary communication                                             | Multidisciplinary Group (MDG) meetings                | [29] |
| 30 | Jego, M. et al. (2018)          | France      | Literature review                       | Primary Care                | x | x   | x   | Homeless people                                           | Health care management                                                      | Primary care programs                                 | [30] |
| 31 | Jong de, F. J. et al. (2009)    | Netherlands | Description of a care model             | Primary Care                | x | x   | x   | Patients with major depression disorder                   | Implementation of the collaborative care model                              | Depression Initiative; Care manager (CM)              | [31] |
| 32 | Kassianos, A. P. et al. (2015)  | UK          | Qualitative interview study             | Health Care Services        | x | x   |     | Elderly patients with diabetes                            | Multidisciplinary group meetings                                            | North West London Integrated Care Pilot               | [32] |
| 33 | Keefe, B. et al. (2009)         | USA         | Qualitative study with focus groups     | Primary Care                | x | x   | x   | Elderly patients                                          | Integrated care                                                             | Primary care team                                     | [33] |
| 34 | Kharicha, K. et al. (2004)      | UK          | Narrative review / expert opinion       | Primary Care                | x | x   | x   | Elderly patients                                          | Process measures for evaluation of Collaborative working                    | Collaborative working (CW); Primary Care Trusts (PCT) | [34] |
| 35 | Lang, C. et al. (2019)          | Germany     | Qualitative interview study             | Primary and Specialist Care | x |     |     | Elderly patients with multimorbidity and multi medication | Interprofessional collaboration                                             | -                                                     | [35] |
| 36 | Leach, B. et al. (2017)         | USA         | Qualitative study with focus groups     | Primary Care                | x | (x) | x   | Primary care patients                                     | Integrated care                                                             | Primary care multidisciplinary team                   | [36] |
| 37 | Lee, L. et al. (2019)           | Canada      | Mixed-methods study                     | Primary Care                | x | x   | x   | Patients with dementia                                    | Integrated care                                                             | Primary Care Collaborative Memory Clinic (PCCMC)      | [37] |
| 38 | Lesser, J. G. (2000)            | USA         | Description of a care model             | Primary Care                | x | x   | (x) | Primary care patients                                     | Interprofessional collaboration                                             | Pioneer Valley Professionals (PVP)                    | [38] |
| 39 | Naqvi, D. et al. (2019)         | UK          | Qualitative interview study             | Primary care                | x | x   |     | Primary care patients                                     | Integrated care                                                             | London-based GP surgeries                             | [39] |

Supplementary Table 1  
Study characteristics and content of all included articles, N=72

|    |                                         |         |                                            |                      |   |   |   |                                                                                            |                                                           |                                                                                                       |      |
|----|-----------------------------------------|---------|--------------------------------------------|----------------------|---|---|---|--------------------------------------------------------------------------------------------|-----------------------------------------------------------|-------------------------------------------------------------------------------------------------------|------|
| 40 | Netting, F. E. & Williams, F. G. (2000) | USA     | Qualitative interview study                | Primary Care         | x | x | x | Elderly patients                                                                           | Case management                                           | -                                                                                                     | [40] |
| 41 | Ní Raghallaigh, M. et al. (2013)        | Ireland | Cross-sectional study and focus group      | Primary Care         | x | x | x | Primary care patients                                                                      | Generic role of social workers                            | Primary Care Social Work (PCSW)                                                                       | [41] |
| 42 | Nielsen, H. W. (2002)                   | Germany | Description of a care model                | Social Work          | x | x |   | Patients with addiction disorders                                                          | Addiction counseling                                      | -                                                                                                     | [42] |
| 43 | Oliva, H. & Walter-Hamann, R. (2013)    | Germany | Reference book                             | Social Work          | x | x | x | Patients with addiction disorders                                                          | Addiction counseling                                      | -                                                                                                     | [43] |
| 44 | Ostovari, M. & Yu, D. (2019)            | USA     | Longitudinal cohort study                  | Health Care Services | x | x |   | Patients with diabetes, hypertension, and/or hyperlipidemia                                | Interprofessional collaboration impact on patient outcome | Care provider network                                                                                 | [44] |
| 45 | Pollard, R. Q. et al. (2014)            | USA     | Descriptions of care models                | Primary Care         | x | x | x | Children with special needs, people with serious mental illness, refugees, and deaf people | Integrated care                                           | Promoting Resources for Integrated Care and Recovery (PRICARe); Mental Health Center of Denver (MHCD) | [45] |
| 46 | Rayner, J. & Muldoon, L. (2017)         | Canada  | Cross-sectional study                      | Community Care       | x | x | x | -                                                                                          | Integrated care                                           | Community health center primary care team                                                             | [46] |
| 47 | Reckrey, J. M. et al. (2014)            | USA     | Project description                        | Home-based care      | x | x | x | Home-bound patients                                                                        | Role of social workers                                    | Mount Sinai Visiting Doctors Program (MSVD); Home-Based Primary Care                                  | [47] |
| 48 | Reckrey, J. M. et al. (2015)            | USA     | Interventional non-randomized cohort study | Home-based care      | x | x | x | Home-bound patients                                                                        | Case management                                           | MSVD                                                                                                  | [48] |
| 49 | Risi, L. et al. (2017)                  | UK      | Longitudinal study                         | Community Care       | x | x | x | Chronically ill patients                                                                   | 'Virtual Wards'                                           | Interdisciplinary Teams (IDTs), Handy Approach                                                        | [49] |
| 50 | Riste, L. K. et al. (2018)              | UK      | Multiple qualitative study                 | Integrated care      | x | x | x | Elderly patients                                                                           | Person-centered care                                      | Multidisciplinary Group (MDG)                                                                         | [50] |
| 51 | Ritchie, C. et al. (2016)               | USA     | Retrospective implementation study         | Primary Care         | x | x | x | 'High-risk' patients                                                                       | Integrated care                                           | Primary care team                                                                                     | [51] |

Supplementary Table 1  
Study characteristics and content of all included articles, N=72

|    |                                            |                |                                     |                                   |   |   |   |                                         |                                                                  |                                                                                                        |      |
|----|--------------------------------------------|----------------|-------------------------------------|-----------------------------------|---|---|---|-----------------------------------------|------------------------------------------------------------------|--------------------------------------------------------------------------------------------------------|------|
| 52 | Ross, H. et al. (2021)                     | USA            | Retrospective comparative study     | Home-based care                   | x | x | x | Adult patients discharged from hospital | Role of social workers                                           | Hospital at Home (HaH) care delivery team                                                              | [52] |
| 53 | Saavedra, N. I. et al. (2019)              | Mexico         | Mixed-methods study                 | Primary Care                      | x | x | x | Mentally ill patients                   | Role of social workers                                           | Primary care centers                                                                                   | [53] |
| 54 | Schepman, S. et al. (2015)                 | Netherlands    | Systematic review                   | Primary Health Care               | x | x | x | Diverse                                 | Integrated care                                                  | -                                                                                                      | [54] |
| 55 | Schouten, B. et al. (2019)                 | Belgium        | Cross-sectional study               | Cancer care                       | x | x | x | Patients with cancer                    | Management of psychosocial issues                                | -                                                                                                      | [55] |
| 56 | Schultz, R. et al. (2021)                  | Denmark        | Qualitative interview study         | Health Care Services              | x | x | x | Patients with chronic widespread pain   | Case management                                                  | -                                                                                                      | [56] |
| 57 | Shanske, S. et al. (2012)                  | USA            | Case study                          | Social Care                       | x | x |   | Young adults                            | Case management                                                  | Transition Brokers                                                                                     | [57] |
| 58 | Sotomayor, C. R. & Gallagher, C. M. (2019) | USA            | Case study                          | Primary Care                      | x | x | x | Diverse                                 | Case management                                                  | Clinical Ethicist                                                                                      | [58] |
| 59 | Stampa de, M. et al. (2013)                | Canada; France | Grounded theory                     | Primary Care                      | x | x | x | Frail elderly patients                  | Integrated care                                                  | System of Integrated Care for Older Patients (SIPA) and Coordination of Care for Older Patients (COPA) | [59] |
| 60 | Stokes, J. et al. (2015)                   | UK             | Meta-analysis                       | Primary Care                      | x | x | x | Patients 'at risk' of hospitalization   | Case management                                                  | Self-reported health status                                                                            | [60] |
| 61 | Stokes, J. et al. (2018)                   | UK             | Qualitative interview study         | Integrated Primary and Acute Care | x | x |   | 'High-risk' patients                    | Case management                                                  | Multidisciplinary team ; 'Integrated primary and acute care system' (PACS)                             | [61] |
| 62 | Stumm, J. et al. (2020)                    | Germany        | Qualitative study with focus groups | Primary Care                      | x | x |   | Multimorbid patients                    | Cooperation of general practitioner and non-medical practitioner | -                                                                                                      | [62] |
| 63 | Ulbricht, S. et al. (2007)                 | Germany        | Cross-sectional study               | Primary Care                      | x | x |   | Patients with an addiction disorder     | Addiction counseling                                             | [Schwerpunktpraxen „Sucht“ ]                                                                           | [63] |
| 64 | Ulrich, L. R. et al. (2019)                | Germany        | Description of a care model         | Primary Care                      | x | x | x | Focus on chronically ill patients       | Integrated care                                                  | Ontario FHT                                                                                            | [64] |
| 65 | Vedel, I. et al. (2009)                    | Canada; France | Quasi-experimental study            | Primary Care                      | x | x | x | Frail elderly patients                  | Integrated care                                                  | Coordination of Professional Care for the Elderly (COPA)                                               | [65] |
| 66 | Vehko, T. et al. (2018)                    | Finland        | Vignette study                      | Primary Health Care               | x | x | x | Primary care patients                   | Integrated care                                                  | Finnish health centers                                                                                 | [66] |

Supplementary Table 1  
Study characteristics and content of all included articles, N=72

|    |                                        |           |                                   |                        |   |     |   |                                                              |                                 |                                                   |      |
|----|----------------------------------------|-----------|-----------------------------------|------------------------|---|-----|---|--------------------------------------------------------------|---------------------------------|---------------------------------------------------|------|
| 67 | Wahler, E. A. & Sullivan, W. P. (2017) | USA       | Description of a care model       | Primary Care           | x | x   |   | Low-income substance abusers with comorbid health conditions | Case management                 | Chronic care model (CCM); Interdisciplinary Teams | [67] |
| 68 | Wang, X. M. & Agius, M. (2019)         | UK        | Description of a care model       | Primary Care           |   | x   | x | Mentally ill patients                                        | Case management                 | Care coordinators                                 | [68] |
| 69 | Welti, F. (2008)                       | Germany   | Narrative review / expert opinion | Medical Rehabilitation | x | x   | x | Rehab patients                                               | Interprofessional collaboration | -                                                 | [69] |
| 70 | White, J. M. et al. (2017)             | UK        | Qualitative interview study       | Primary Health Care    | x | (x) | x | Primary care patients                                        | Social prescribing              | Third sector practitioners                        | [70] |
| 71 | Williams, V. N. et al. (2021)          | USA       | Case study                        | Primary Care           | x | x   | x | Young families experiencing social and economic adversities  | Interprofessional collaboration | Nurse--Family Partnership (NFP)                   | [71] |
| 72 | Yeo, G. T. S. et al. (2021)            | Singapore | Qualitative interview study       | Community Care         | x | x   | x | Complex patients                                             | Case management                 | Community case managers; Primary care team        | [72] |

## REFERENCES

- 1 Ashcroft R, Kourgiantakis T, Fearing G, et al. Social Work's Scope of Practice in Primary Mental Health Care: A Scoping Review. *The British Journal of Social Work* 2018;49(2):318–34. <https://doi.org/10.1093/bjsw/bcy051>.
- 2 Ashcroft R, McMillan C, Ambrose-Miller W, et al. The Emerging Role of Social Work in Primary Health Care: A Survey of Social Workers in Ontario Family Health Teams. *Health Soc Work* 2018;43(2):109–17.
- 3 Batchelor P, Kingsland J. Improving the Health of the Homeless and How to Achieve It within the New NHS Architecture. *Int J Environ Res Public Health* 2020;17(11). doi:10.3390/ijerph17114100 [published Online First: 8 June 2020].
- 4 Bauer D, Batson R, Hayden W, et al. Integrating Behavioral Health Services within a Primary Care Center in a Rural Setting. *Families in Society* 2005;86(1):63–70.
- 5 Berner B, Floh S. Chancengleichheit für vulnerable Personengruppen in der medizinischen Versorgung zur Bedeutung von Niederschwelligkeit und einer interdisziplinären Zusammenarbeit zwischen Sozialer Arbeit und Medizin 2017.
- 6 Berrett-Abebe J, Donelan K, Berkman B, et al. Physician and nurse practitioner perceptions of social worker and community health worker roles in primary care practices caring for frail elders: Insights for social work. *Soc Work Health Care* 2020;59(1):46–60. doi:10.1080/00981389.2019.1695703 [published Online First: 29 November 2019].

## Supplementary Table 1

Study characteristics and content of all included articles, N=72

- 7 Beushausen J, Caby A. Soziale Arbeit in der ärztlichen Praxis: Optimierung der ärztlichen Versorgung. *Theorie und Praxis der Sozialen Arbeit* 2012;63:125–3131.
- 8 Bower P, Reeves D, Sutton M, et al. Improving care for older people with long-term conditions and social care needs in Salford: the CLASSIC mixed-methods study, including RCT. Southampton (UK) 2018.
- 9 Bowers L, Clark N, Callaghan P. Multidisciplinary Reflections on Assessment for Compulsory Admission: The View of Approved Social Workers, General Practitioners, Ambulance Crews, Police, Community Psychiatric Nurses and Psychiatrists. *The British Journal of Social Work* 2003;33(7):961–68.
- 10 Buhr G, Dixon C, Dillard J, et al. Geriatric Resource Teams: Equipping Primary Care Practices to Meet the Complex Care Needs of Older Adults. *Geriatrics (Basel)* 2019;4(4). doi:10.3390/geriatrics4040059 [published Online First: 21 October 2019].
- 11 Burroughs H, Bartlam B, Bullock P, et al. Non-traditional support workers delivering a brief psychosocial intervention for older people with anxiety and depression: the NOTEPAD feasibility study. Southampton (UK) 2019.
- 12 Chan B, Edwards ST, Devoe M, et al. The SUMMIT ambulatory-ICU primary care model for medically and socially complex patients in an urban federally qualified health center: study design and rationale. *Addict Sci Clin Pract* 2018;13(1):27. doi:10.1186/s13722-018-0128-y [published Online First: 14 December 2018].
- 13 Coleman A, Rummery K. Social services representation in Primary Care Groups and Trusts. *J Interprof Care* 2003;17(3):273–80.
- 14 Dambha-Miller H, Simpson GW, Hobson L, et al. Integrating primary care and social services for older adults with multimorbidity: A qualitative study. *Br J Gen Pract* 2021. doi:10.3399/BJGP.2020.1100 [published Online First: 17 May 2021].
- 15 Davey B, Levin E, Iliffe S, et al. Integrating health and social care: implications for joint working and community care outcomes for older people. *J Interprof Care* 2005;19(1):22–34.
- 16 Davidsen AS, Davidsen J, Jønsson ABR, et al. Experiences of barriers to trans-sectoral treatment of patients with severe mental illness. A qualitative study. *Int J Ment Health Syst* 2020;14(1):87. doi:10.1186/s13033-020-00419-x [published Online First: 30 November 2020].
- 17 do Céu Barbieri-Figueiredo M, Vilar AI, Andrede L, et al. Familiengesundheitspflege - Entwicklung und Implementation in der Primärversorgung in Portugal. *Beltz Juventa. Pflege & Gesellschaft* 2017;22(1):51–66.
- 18 van Dongen JJJ, van Bokhoven MA, Goossens WNM, et al. Suitability of a Programme for Improving Interprofessional Primary Care Team Meetings. *Int J Integr Care* 2018;18(4):12. doi:10.5334/ijic.4179 [published Online First: 13 December 2018].
- 19 Draper B, Low L-F, Brodaty H. Integrated care for adults with dementia and other cognitive disorders. *Int Rev Psychiatry* 2018;30(6):272–91. doi:10.1080/09540261.2018.1564021 [published Online First: 27 February 2019].
- 20 Drennan V, Iliffe S, Haworth D, et al. The feasibility and acceptability of a specialist health and social care team for the promotion of health and independence in 'at risk' older adults 2005.

## Supplementary Table 1

Study characteristics and content of all included articles, N=72

- 21 Ferrante JM, Cohen DJ, Crosson JC. Translating the patient navigator approach to meet the needs of primary care. *J Am Board Fam Med* 2010;23(6):736–44.
- 22 Finker S. Sozialarbeit in der (neuen) Primärversorgung Chancen und Herausforderungen. *Sozialarbeit in Österreich* 2017(3):19–22.
- 23 Fraser MW, Lombardi BM, Wu S, et al. Integrated Primary Care and Social Work: A Systematic Review. *Journal of the Society for Social Work and Research* 2018;9(2):175–215.
- 24 Gadiant M. Gelebte Kooperation Suchtberatung und Hausarztmedizin 2015.
- 25 García-Quinto M, Briones-Vozmediano E, Otero-García L, et al. Social workers' perspectives on barriers and facilitators in responding to intimate partner violence in primary health care in Spain. *Health Soc Care Community* 2021. doi:10.1111/hsc.13377 [published Online First: 6 April 2021].
- 26 Grol SM, Molleman GRM, Kuijpers A, et al. The role of the general practitioner in multidisciplinary teams: a qualitative study in elderly care. *BMC Fam Pract* 2018;19(1):40. doi:10.1186/s12875-018-0726-5 [published Online First: 10 March 2018].
- 27 Hanratty B, Lowson E, Grande G, et al. Transitions at the end of life for older adults – patient, carer and professional perspectives: a mixed-methods study. Southampton (UK) 2014.
- 28 Happell B, Platania-Phung C, Scott D. Mental Health Nurse Incentive Program: facilitating physical health care for people with mental illness? *Int J Ment Health Nurs* 2013;22(5):399–408. doi:10.1111/inm.12006 [published Online First: 24 December 2012].
- 29 Harris M, Greaves F, Gunn L, et al. Multidisciplinary integration in the context of integrated care - results from the North West London Integrated Care Pilot 2013.
- 30 Jegó M, Abcaya J, Ștefan D-E, et al. Improving Health Care Management in Primary Care for Homeless People: A Literature Review. *Int J Environ Res Public Health* 2018;15(2). doi:10.3390/ijerph15020309 [published Online First: 10 February 2018].
- 31 Jong F de, van Steenberghe-Weijnenburg KM, Huijbregts KM, et al. The Depression Initiative. Description of a collaborative care model for depression and of the factors influencing its implementation in the primary care setting in the Netherlands. *Int J Integr Care* 2009;9(15).
- 32 Kassianos AP, Ignatowicz A, Greenfield G, et al. "Partners rather than just providers...": A qualitative study on health care professionals' views on implementation of multidisciplinary group meetings in the North West London Integrated Care Pilot 2015.
- 33 Keefe B, Geron SM, Enguidanos S. Integrating social workers into primary care: physician and nurse perceptions of roles, benefits, and challenges. *Soc Work Health Care* 2009;48(6):579–96.
- 34 Kharicha K, Levin E, Iliffe S, et al. Social work, general practice and evidence-based policy in the collaborative care of older people: current problems and future possibilities 2004;12(2):134–41.



## Supplementary Table 1

Study characteristics and content of all included articles, N=72

- 35 Lang C, Gottschall M, Sauer M, et al. „Da kann man sich ja totklingeln, geht ja keiner ran“ – Schnittstellenprobleme zwischen stationärer, hausärztlicher und ambulant-fachspezialisierter Patientenversorgung aus Sicht Dresdner Hausärzte. *Gesundheitswesen* 2019;81(10):822–30. doi:10.1055/a-0664-0470 [published Online First: 16 August 2018].
- 36 Leach B, Morgan P, Strand de Oliveira J, et al. Primary care multidisciplinary teams in practice: a qualitative study. *BMC Fam Pract* 2017;18(1):115. doi:10.1186/s12875-017-0701-6 [published Online First: 29 December 2017].
- 37 Lee L, Hillier LM, Gregg S. Partnerships for improving dementia care in primary care: Extending access to primary care-based memory clinics in Ontario, Canada. *Health Soc Care Community* 2019;27(6):1574–85. doi:10.1111/hsc.12829 [published Online First: 26 August 2019].
- 38 Lesser JG. *Clinical Social Work and Family Medicine: A Partnership in Community Service* 2000.
- 39 Naqvi D, Malik A, Al-Zubaidy M, et al. The general practice perspective on barriers to integration between primary and social care: a London, United Kingdom-based qualitative interview study. *BMJ Open* 2019;9(8):e029702. doi:10.1136/bmjopen-2019-029702 [published Online First: 20 August 2019].
- 40 Netting FE, Williams FG. Expanding the Boundaries of Primary Care for Elderly People. *Health Soc Work* 2000;25(4):233–42.
- 41 Ní Raghallaigh M, Allen M, Cunniffe R, et al. Experiences of social workers in primary care in Ireland. *Soc Work Health Care* 2013;52(10):930–46.
- 42 Nielsen H-W. „Die“ Begegnung und den Diskurs suchen die Rolle der Medizin in einer Suchtberatungsstelle / kompetente Teams aus verschiedenen Berufsgruppen bilden. *PARTNER-Magazin* 2002(4):26–29.
- 43 Oliva H, Walter-Hamann R. *Suchthilfe in Netzwerken: Praxishandbuch zu Strategie und Kooperation*, 1st edn. Freiburg: Lambertus 2013.
- 44 Ostovari M, Yu D. Impact of care provider network characteristics on patient outcomes: Usage of social network analysis and a multi-scale community detection. *PLoS One* 2019;14(9):e0222016. doi:10.1371/journal.pone.0222016 [published Online First: 9 September 2019].
- 45 Pollard RQ, Betts WR, Carroll JK, et al. Integrating primary care and behavioral health with four special populations: Children with special needs, people with serious mental illness, refugees, and deaf people. *Am Psychol* 2014;69(4):377–87.
- 46 Rayner J, Muldoon L. Staff perceptions of community health centre team function in Ontario. *Canadian Family Physician* 2017;63(7):335–40.
- 47 Reckrey JM, Gettenberg G, Ross H, et al. The critical role of social workers in home-based primary care. *Soc Work Health Care* 2014;53(4):330–43.
- 48 Reckrey JM, Soriano TA, Hernandez CR, et al. The team approach to home-based primary care: restructuring care to meet individual, program, and system needs. *J Am Geriatr Soc* 2015;63(2):358–64. doi:10.1111/jgs.13196 [published Online First: 30 January 2015].

## Supplementary Table 1

Study characteristics and content of all included articles, N=72

- 49 Risi L, Brown J, Sugarhood P, et al. The Handy Approach - Quick Integrated Person Centred Support Preparation. *BMJ Qual Improv Rep* 2017;6(1). doi:10.1136/bmjquality.u214461.w5681 [published Online First: 7 June 2017].
- 50 Riste LK, Coventry PA, Reilly ST, et al. Enacting person-centredness in integrated care: A qualitative study of practice and perspectives within multidisciplinary groups in the care of older people. *Health Expect* 2018;21(6):1066–74. doi:10.1111/hex.12803 [published Online First: 13 July 2018].
- 51 Ritchie C, Andersen R, Eng J, et al. Implementation of an Interdisciplinary, Team-Based Complex Care Support Health Care Model at an Academic Medical Center: Impact on Health Care Utilization and Quality of Life. *PLoS One* 2016;11(2):e0148096. doi:10.1371/journal.pone.0148096 [published Online First: 12 February 2016].
- 52 Ross H, Dritz R, Morano B, et al. The unique role of the social worker within the Hospital at Home care delivery team. *Soc Work Health Care* 2021;60(4):354–68. doi:10.1080/00981389.2021.1894308 [published Online First: 1 March 2021].
- 53 Saavedra NI, Berenzon S, Galván J. The role of social workers in mental health care: A study of primary care centers in Mexico. *Qualitative Social Work* 2019;18(6):1017–33.
- 54 Schepman S, Hansen J, Putter ID de, et al. The common characteristics and outcomes of multidisciplinary collaboration in primary health care: a systematic literature review 2015.
- 55 Schouten B, Bergs J, Vankrunkelsven P, et al. Healthcare professionals' perspectives on the prevalence, barriers and management of psychosocial issues in cancer care: A mixed methods study. *Eur J Cancer Care (Engl)* 2019;28(1):e12936. doi:10.1111/ecc.12936 [published Online First: 9 October 2018].
- 56 Schultz R, Broström Kousgaard M, Davidsen AS. "We have two different agendas": the views of general practitioners, social workers and hospital staff on interprofessional coordination for patients with chronic widespread pain. *J Interprof Care* 2021;35(2):284–92. doi:10.1080/13561820.2020.1749576 [published Online First: 16 April 2020].
- 57 Shanske S, Arnold J, Carvalho M, et al. Social workers as transition brokers: facilitating the transition from pediatric to adult medical care. *Soc Work Health Care* 2012;51(4):279–95.
- 58 Sotomayor CR, Gallagher CM. The Team Based Biopsychosocial Model: Having a Clinical Ethicist as a Facilitator and a Bridge Between Teams. *HEC Forum* 2019;31(1):75–83.
- 59 Stampa M de, Vedel I, Bergman H, et al. Opening the black box of clinical collaboration in integrated care models for frail, elderly patients. *Gerontologist* 2013;53(2):313–25. doi:10.1093/geront/gns081 [published Online First: 7 September 2012].
- 60 Stokes J, Panagioti M, Alam R, et al. Effectiveness of Case Management for 'At Risk' Patients in Primary Care: A Systematic Review and Meta-Analysis. *PLoS One* 2015;10(7):e0132340. doi:10.1371/journal.pone.0132340 [published Online First: 17 July 2015].
- 61 Stokes J, Riste L, Cheraghi-Sohi S. Targeting the 'right' patients for integrated care: stakeholder perspectives from a qualitative study. *J Health Serv Res Policy* 2018;23(4):243–51. doi:10.1177/1355819618788100 [published Online First: 8 July 2018].

## Supplementary Table 1

Study characteristics and content of all included articles, N=72

- 62 Stumm J, Peter L, Sonntag U, et al. Nichtmedizinische Aspekte der Versorgung multimorbider Patient\*innen in der Hausarztpraxis. Welche Unterstützung und Kooperationen werden gewünscht? Fokusgruppen mit Berliner Hausarzt\*innen. *Z Evid Fortbild Qual Gesundheitswes* 2020;158-159:66–73. doi:10.1016/j.zefq.2020.09.001 [published Online First: 10 November 2020].
- 63 Ulbricht S, Coder B, Röske K, et al. Die Überweisung von Patienten mit Abhängigkeitserkrankungen in die ambulante und stationäre professionelle Suchtkrankenhilfe - Ergebnisse einer repräsentativen Befragung unter Hausärzten in Mecklenburg-Vorpommern. *Gesundheitswesen* 2007;69(5):306–10.
- 64 Ulrich L-R, Pham T-NT, Gerlach FM, et al. Family Health Teams in Ontario – Vorstellung eines kanadischen Primärversorgungsmodells und Anregungen für Deutschland. *Gesundheitswesen* 2019;81(6):492–97. doi:10.1055/s-0043-111406 [published Online First: 11 July 2017].
- 65 Vedel I, Stampa M de, Bergman H, et al. A novel model of integrated care for the elderly: COPA, Coordination of Professional Care for the Elderly 2009.
- 66 Vehko T, Jolanki O, Aalto A-M, et al. How do health care workers manage a patient with multiple care needs from both health and social care services? - A vignette study. *Int J Care Coord* 2018;21(1-2):5–14. doi:10.1177/2053434517744070 [published Online First: 21 November 2017].
- 67 Wahler EA, Sullivan WP. There's No Time like the Present: Improving the Current System of Care for Low-Income Substance Abusers with Comorbid Health Conditions. *Families in Society* 2017;98(4):292–99.
- 68 Wang XM, Agius M. The role of care coordinators versus doctors in the management of chronic mental illness in the community. *Psychiatria Danubina* 2019;31(1):622–25.
- 69 Welti F. Koordination in der medizinischen Rehabilitation: Anforderungen an Berufsgruppen und Institutionen. *Rehabilitation (Stuttg)* 2008;47(4):236–42.
- 70 White JM, Cornish F, Kerr S. Front-line perspectives on 'joined-up' working relationships: a qualitative study of social prescribing in the west of Scotland. *Health Soc Care Community* 2017;25(1):194–203. doi:10.1111/hsc.12290 [published Online First: 12 October 2015].
- 71 Williams VN, Lopez CC, Tung GJ, et al. A case study of care co-ordination between primary care providers and nurse home visitors to serve young families experiencing adversity in the Northwestern United States. *Health Soc Care Community* 2021. doi:10.1111/hsc.13470 [published Online First: 11 June 2021].
- 72 Yeo GTS, Kannan P, Lee ES, et al. Community case managers' challenges collaborating with primary care when managing complex patients in the community: A qualitative study in Singapore. *Health Soc Care Community* 2021. doi:10.1111/hsc.13489 [published Online First: 12 July 2021].
